# Supplementary material for: Characterization of Transcription from TATA-Less Promoters: Identification of a New Core Promoter Element XCPE2 and Analysis of Factor Requirements
Source: PLoS One. 2009 Apr 1;4(4):e5103. doi: 10.1371/journal.pone.0005103 (PMC2659449; doi:10.1371/journal.pone.0005103)
Supplement: Table S1 — Human gene promoters that contain XCPE2 sequences around previously identified transcriptional start sites. A list of candidate human genes that utilize XCPE2 (0.06 MB XLS) [file pone.0005103.s001.xls]

## Sheet: Sheet1
Table S1. Human gene promoters that contain XCPE2 sequences around previously identified transcriptional start sitesa
							Nucleotide positions and frequency of transcriptional start sites (TSSs) described in DBTSS database (*) and the TSSs detected in this study (*)c
Entrez			Identified
ID	AP	Gene name	XCPE2												V	C	Y	C	R	T	T	R	C	M	Y
			sequenceb	-20	-19	-18	-17	-16	-15	-14	-13	-12	-11	10	-9	-8	-7	-6	-5	-4	-3	-2	-1	1	2	3	4	5	6	7	8	9	10	11	12	13	14	15	16	17	18	19	20
N/A		HBV X gene (start site 2)	CCCCGTTGCCC																					*	*
9851	1	Hypothetical protein LOC9851	CCCCGTTGCCC			6*																								1*			4*	1*		2*
6103	1	Retinitis pigmentosa GTPase regulator isoform A, B, C	CCCCGTTGCCC			1*																				1*		4*			1*			1*	1*
5265	2	Serine (or cysteine) proteinase inhibitor, clade	CCCCGTTGCCC																																						1*		3*
80129	1	Hypothetical protein, LOC80129	ACCCGTTGCCC																1*										1*
23527	1	Centaurin, beta 2	ACCCGTTGCCC										1*
6861	2	Synaptotagmin V	ACCCGTTGCCC																															1*
80829	1	Zinc finger protein 91 isoform 1 and 2	CCTCGTTGCCC																1*
89433	1	Hypothetical protein, LOC84933	CCTCGTTGCCC								6*		1*			2*			1*																		1*					2*
114826	3	SET and MYND domain containing 4	CCCCATTGCCC																1*
51665	1	Ankyrin repeat and SOCS box-containing protein	CCCCATTGCCC											*	*	*			1**			*		*	*		2*					*	*
5118	1	Procollagen C-endopeptidase enhancer	CCCCATTGCCC																1*																			1*
9056	4	Solute carrier family 7 (cationic amino acid)	CCCCGTTACCC			1*	6*					7*									1*	3*										2*											1*
129880	1	Bardet-Biedl syndrome 5	GCCCGTTGCCT			1*											1*		3*															1*			1*				1*		2*
4015	1	Lysyl oxidase preproprotein	GCCCGTTGCCT															1*											2*
5170	2	3-Phosphoinositide dependant protin kinase-1	GCTCGTTGCCC																							2*																	1*
11188	6	Nischarin	GCCCATTGCCC		1*	1*																											1*				1*						4*
960	1	CD44 antigen isoform 1,2,3,4,5	CCTCATTGCCC					1*	1*	1*	3*	5*	38*	4*	21*	336*	27*	6*	313*	5*	2*											1*	1*
619279	3	Zinc finger protein 704	CCTCGTTACCC																																			1*
	2	ENSEMBL Transcript ID: ENST00000268533	CCCCATTGCAC																				*	*								1*
5214	2	Phosphofructokinase, platelet	CCCCATTGCCT												1*		1*	1*	24*
7852	2	Chemokine (c-X-C motif) receptor 4 isoform b and a	CCCCGTTACCT																			1*
58486	3	Zinc finger, BED-type containing 5	ACTCATTGCCC										1*
6235	1	ribosomal protein S29 isoform 1 and 2	CCTCGTTGCAC	1*	6*	3*	2*	20*	35*	6*	3*	2*		1*			1*
51248	1	PDZ domain contianing 11	GCTCGTTGCAC																								1*												1*
27044	1	Staphylococcal nuclease domain containing 1	ACTCGTTGCCT		2*											1*				1*				1*		2*				1*
57508	4	Integrator complex subnit 2	GCTCGTTGCCT									1*
8915	1	B-cell CLL/lyphoma 10	GCCCATTGCAC									1*							1*		1*	1*																				1*
25822	2	DnaJ (Hsp40) homolog, subfamili B, member 5	ACCCGTTACAC																								1*
65057	1	Adrenocortical dysplasia homolog	GCCCGTTGCAT		1*	1*	3*		1*										4*			3*		1*				1*						1*	2*		2*			1*
24140	1	FtsJ homolog 1 isoform b and a	GCCCGTTGCAT																										1*1*	1			1*					4*
9788	6	Metastasis suppressor 1	CCTCATTGCCT																1*	1*
4162	1	Melanoma cell adhesion molecule	CCTCATTGCCT			1*
84227	3	Regulator of G-protein signalling like 2	CCCCATTACAC					*					*	*			*	*				1**				*	*			*		*					*
55188	1	Resistance to inhibitors of cholinesterase 8	CCCCATTGCAT																		1*
54752	1	Fibronectin type III domain containing 8	GCTCATTGCAC																1*																			1*
23019	3	CCR4-NOT Transcriptio complex, subunit 1	ACTCATTGCAC															1*							1*										1*		1*
169981	1	Spindilin family, member 3	ACTCATTGCCT												1*
81887	3	complement component 1, r subcomponent-like	ACTCATTGCCT			1*
10645	1	Calcium / calmodulin-dependant protein kinase	GCTCGTTGCAT																									1*
7314	1	Ubiquitin B precursor	ACTCGTTGCAT								1*	14*	3*	1*	7*	1*		1*	15*	1*		4*		3*		6*				1*
4212	2	Homeobox protein Meis2 isoform	ACTCGTTGCAT												17*				2*			3*		1*		1*
2012	1	Epithelial membrane protein 1	GCCCATTACAC	1*					1*								2*	2*	20*	1*	9*	137*		5*						1*	7*			2*		3*			4*	1*		1*
56929	2	Feminization 1 homolog A	GCCCATTACAC													1*	1*		10*			1*				1*										2*	1*
401105	1	Hypothetical protein LOC401105	GCCCATTGCAT																																					1*
18	2	MMS19-like (MET 18 homolog, S. cerevisiae)	CCTCATTACCT													1*
57575	1	Protocadherin 10 isoform 1 and 2 precursor	GCTCATTACAC																						1*
51203	1	Nucleolar and spindle associated protin 1	ACTCGTTACCT																							1*
5724	1	Platelet-activating factor receptor	ACTCATTACCT																5*			3*	1*																				1*
94134	2	Rho GTPase activating protein 12	GCTCATTACCT															1*
57594	1	Homeodomain leucine zipper protein	CCTCATTACAT				1*												1*
54873	1	Palmdelphin	CCTCATTACAT					1*								1*	1*	1*	16*		1*	6*				1*		2*				1*
a The genes are sorted by XCPE2 sequences and shown in the order of increasing numbers of nucleotides different from the XCPE2 sequence in the HBV X promoter.
b Nucleotides identical to the HBV XCPE2 sequence are shown in black, and the nucleotides diverged from the HBV XCPE2 sequence are shown in red. YYANW(G/A)Y sequences, which are one nucleotide different from the Inr consensus sequence
(YYANWYY), are highlighted withgreen or pink, considering the possibility that it might, as a "near initiator", be driving transcription from the "-5" position of XCPE2.
c Positions of XCPE2 sequences are highlighted with light or dark blue. Highlighted with dark blue are positions of expected TSSs. Because the C-->A point mutation of nt1029 of HBV sequence showed one or two-nucleotide upstream-shift (see Fig. 1B), some of
the positions -1 and -2 are also highlighted. TSSs found in the DBTSS database are shown by black asterisks(*) with numbers that show how many cDNA clones with that 5'-end have been identified. TSSs identified in this study are shown by red asterisks(*).
AP: alternative promoter number
